# Supplementary material
Source: MDPI journal article supplement (https://www.mdpi.com/1424-2818/13/3/103)

Supplemental Figure 1. Admixture results for population clustering when K = 3-5. The coefficient of variation error is also given for each proposed number of clusters.

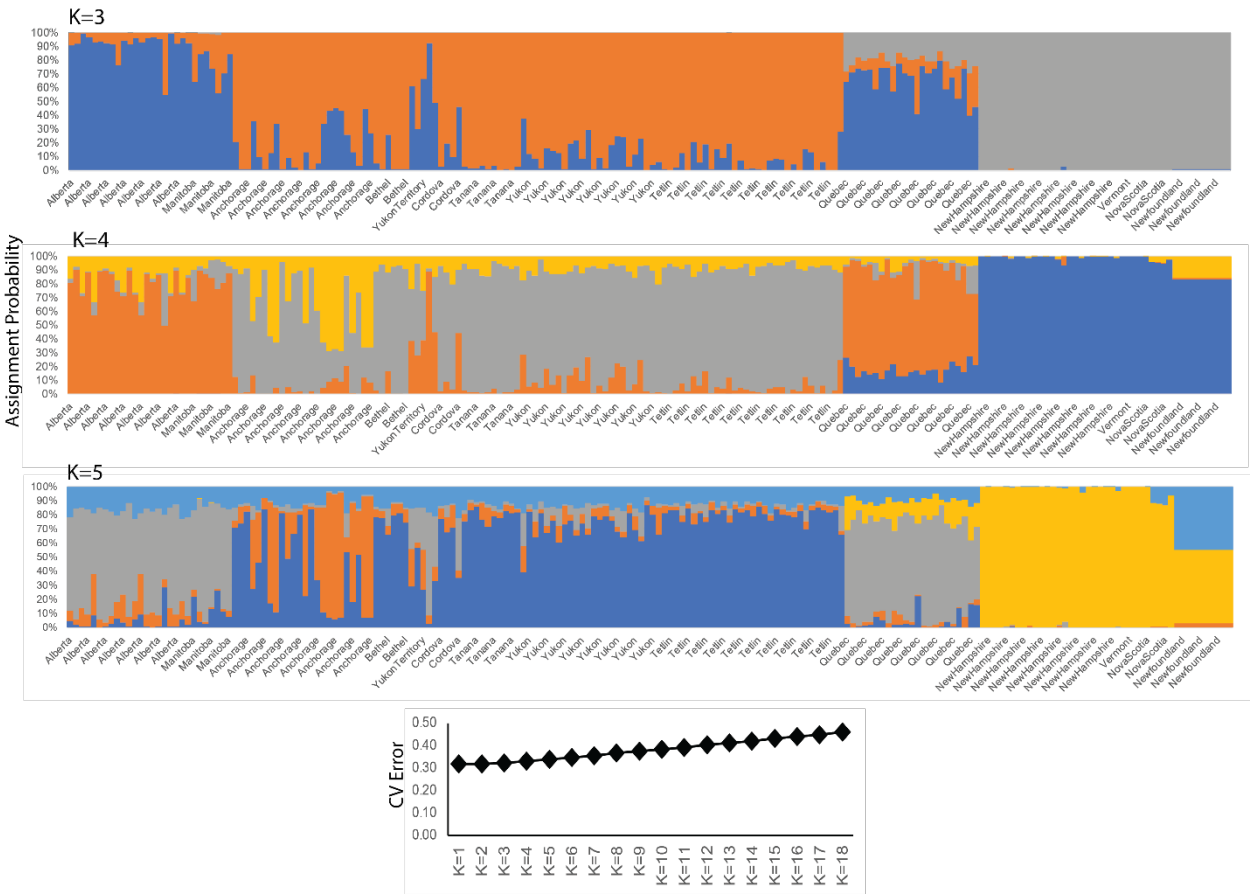

A heatmap visualization of a distance matrix for 118 samples. The color scale on the right ranges from 27.4 (yellow) to 118 (dark blue). The dendrogram at the top shows hierarchical clustering, with major branches labeled with values such as 0.002, 0.003, 0.004, 0.005, 0.006, 0.007, 0.008, 0.009, 0.010, 0.011, 0.012, 0.013, 0.014, 0.015, 0.016, 0.017, 0.018, 0.019, 0.020, 0.021, 0.022, 0.023, 0.024, 0.025, 0.026, 0.027, 0.028, 0.029, 0.030, 0.031, 0.032, 0.033, 0.034, 0.035, 0.036, 0.037, 0.038, 0.039, 0.040, 0.041, 0.042, 0.043, 0.044, 0.045, 0.046, 0.047, 0.048, 0.049, 0.050, 0.051, 0.052, 0.053, 0.054, 0.055, 0.056, 0.057, 0.058, 0.059, 0.060, 0.061, 0.062, 0.063, 0.064, 0.065, 0.066, 0.067, 0.068, 0.069, 0.070, 0.071, 0.072, 0.073, 0.074, 0.075, 0.076, 0.077, 0.078, 0.079, 0.080, 0.081, 0.082, 0.083, 0.084, 0.085, 0.086, 0.087, 0.088, 0.089, 0.090, 0.091, 0.092, 0.093, 0.094, 0.095, 0.096, 0.097, 0.098, 0.099, 0.100, 0.101, 0.102, 0.103, 0.104, 0.105, 0.106, 0.107, 0.108, 0.109, 0.110, 0.111, 0.112, 0.113, 0.114, 0.115, 0.116, 0.117, 0.118. The heatmap shows a strong diagonal of high values (dark blue) and a large block of low values (yellow) in the bottom right corner, indicating a distinct cluster of samples.

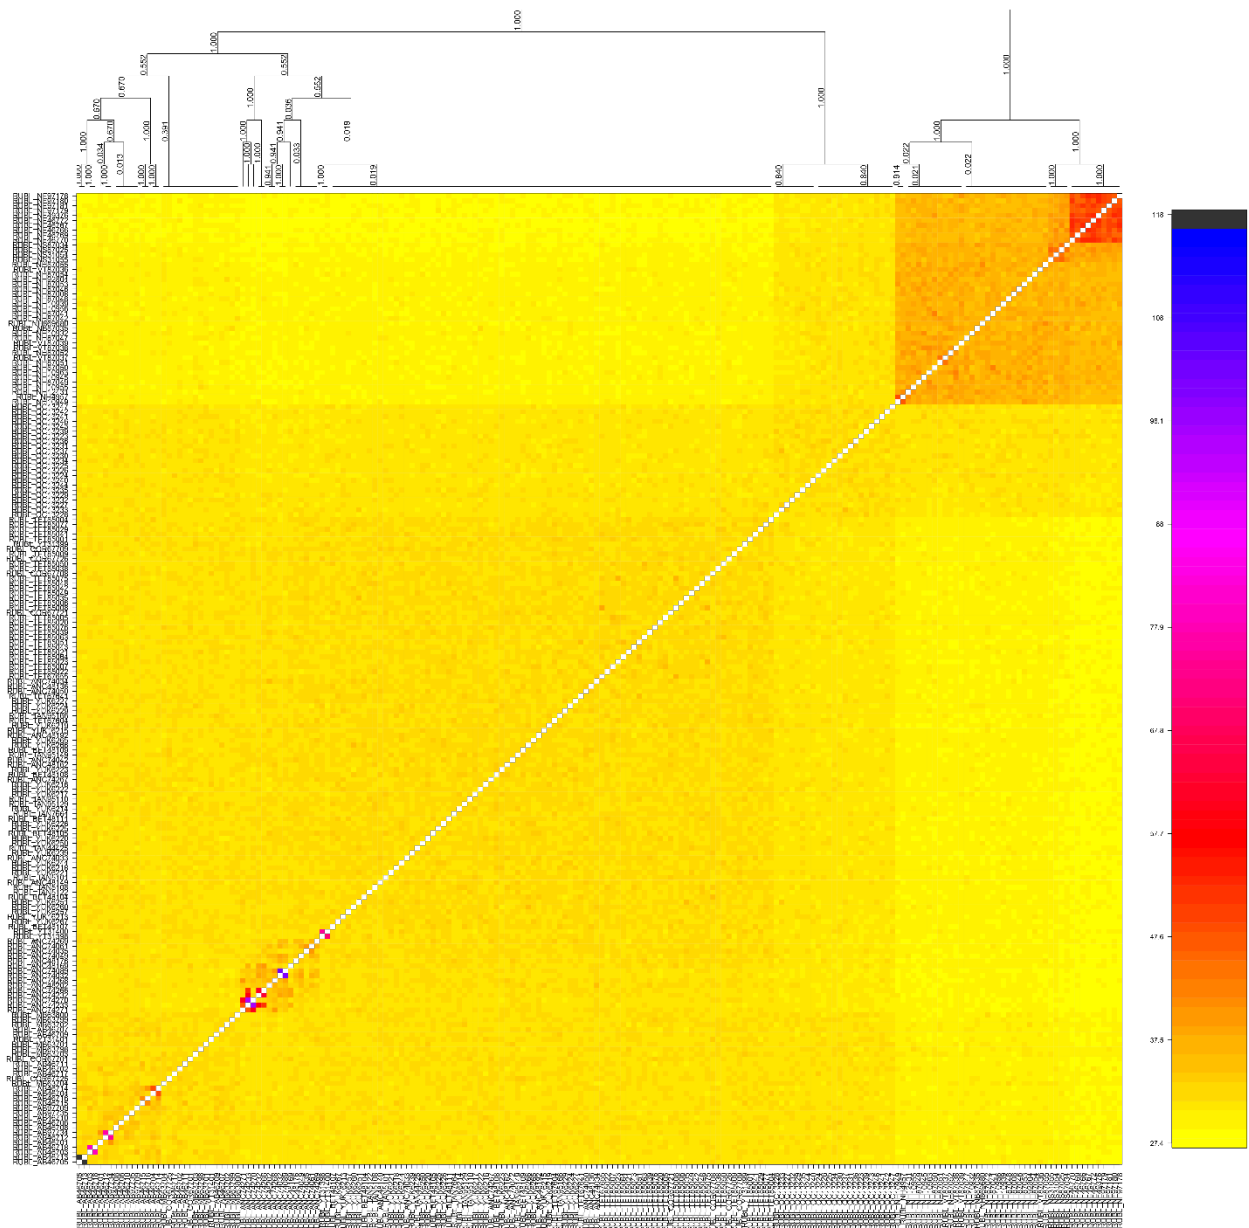

Supplement: s1 [file s1 › diversity-1123851-supplementary.pdf]
